# Supplementary material for: Structural and Functional Enrichment Analyses for Antimicrobial Peptides
Source: Preprints.org preprint supplement (doi:10.20944/preprints202007.0438.v1), 2020-07-19
Supplement: Supplementary file 1 [file TablesS1.xlsx]

## Sheet: TableS1.EnrichedFunction(CATH)
CATH		Identity	Antibacterial		AntigramP		AntigramN		Antifungal		Antiviral		Antiparasitic		Anticancer
		%	m/n	p	m/n	p	m/n	p	m/n	p	m/n	p	m/n	p	m/n	p
Alpha Beta		100	44/106	1.000	34/106	1.000	25/106	1.000	72/106	3.86e-08	5/106	0.810	2/106	0.845	7/106	0.008
2-Layer Sandwich		90	24/46	1.000	22/46	0.999	17/46	1.000	30/46	0.000580693	4/46	0.322	0/46	1.000	3/46	0.074
		80	18/38	1.000	17/38	1.000	12/38	1.000	27/38	0.000120953	4/38	0.206	1/38	0.709	2/38	0.197
		70	16/31	1.000	14/31	0.998	10/31	1.000	21/31	0.0014537	4/31	0.119	2/31	0.232	1/31	0.488
		60	13/27	1.000	11/27	0.999	8/27	1.000	19/27	0.00136	4/27	0.089	2/27	0.204	0/27	1.000
		50	11/25	1.000	9/25	1.000	8/25	1.000	18/25	0.000914	3/25	0.222	2/25	0.180	0/25	1.000
Alpha Beta		100	25/25	0.025	18/25	0.509	22/25	0.007	10/25	0.655	2/25	0.474	0/25	1.000	0/25	1.000
Roll		90	15/15	0.104	12/15	0.288	13/15	0.047	5/15	0.797	1/15	0.620	0/15	1.000	0/15	1.000
		80	15/15	0.091	11/15	0.479	13/15	0.043	5/15	0.796	1/15	0.618	0/15	1.000	0/15	1.000
		70	15/15	0.089	11/15	0.480	13/15	0.043	5/15	0.781	1/15	0.616	0/15	1.000	0/15	1.000
		60	12/12	0.131	8/12	0.682	10/12	0.111	5/12	0.568	1/12	0.548	0/12	1.000	0/12	1.000
		50	11/11	0.153	8/11	0.531	10/11	0.045	3/11	0.874	1/11	0.527	0/11	1.000	0/11	1.000
Alpha Beta		100	7/9	0.886	5/9	0.901	7/9	0.312	4/9	0.567	2/9	0.106	0/9	1.000	0/9	1.000
3-Layer Sandwich		90	7/9	0.881	5/9	0.898	7/9	0.299	4/9	0.533	2/9	0.104	0/9	1.000	0/9	1.000
	(aba)	80	7/9	0.865	5/9	0.888	7/9	0.287	4/9	0.531	2/9	0.103	0/9	1.000	0/9	1.000
		70	7/9	0.863	5/9	0.889	7/9	0.287	4/9	0.514	2/9	0.102	0/9	1.000	0/9	1.000
		60	6/8	0.886	4/8	0.930	6/8	0.366	4/8	0.410	2/8	0.088	0/8	1.000	0/8	1.000
		50	7/9	0.845	5/9	0.885	7/9	0.288	4/9	0.503	2/9	0.113	0/9	1.000	0/9	1.000
Mainly Alpha		100	37/39	0.081	26/39	0.738	26/39	0.429	11/39	0.975	0/39	1.000	3/39	0.116	1/39	0.580
Orthogonal Bundle		90	23/24	0.132	18/24	0.376	16/24	0.456	8/24	0.825	0/24	1.000	2/24	0.167	0/24	1.000
		80	21/22	0.143	16/22	0.451	15/22	0.387	8/22	0.729	0/22	1.000	2/22	0.152	0/22	1.000
		70	20/21	0.158	15/21	0.509	13/21	0.628	7/21	0.798	0/21	1.000	2/21	0.125	0/21	1.000
		60	18/19	0.180	14/19	0.415	13/19	0.385	7/19	0.699	0/19	1.000	2/19	0.116	0/19	1.000
		50	17/18	0.201	15/18	0.136	11/18	0.659	8/18	0.417	0/18	1.000	2/18	0.105	0/18	1.000
Mainly Alpha		100	22/23	0.155	18/23	0.266	14/23	0.704	0/23	1.000	0/23	1.000	0/23	1.000	0/23	1.000
Up-down Bundle		90	17/17	0.077	13/17	0.378	10/17	0.742	0/17	1.000	0/17	1.000	0/17	1.000	0/17	1.000
		80	15/15	0.091	11/15	0.479	8/15	0.848	0/15	1.000	0/15	1.000	0/15	1.000	0/15	1.000
		70	14/14	0.105	11/14	0.324	8/14	0.766	0/14	1.000	0/14	1.000	0/14	1.000	0/14	1.000
		60	13/13	0.110	10/13	0.373	7/13	0.823	0/13	1.000	0/13	1.000	0/13	1.000	0/13	1.000
		50	10/10	0.181	8/10	0.348	6/10	0.702	0/10	1.000	0/10	1.000	0/10	1.000	0/10	1.000
Mainly Beta		100	21/28	0.970	18/28	0.808	21/28	0.151	14/28	0.251	2/28	0.535	4/28	0.010	0/28	1.000
Beta Barrel		90	20/25	0.876	17/25	0.666	20/25	0.059	11/25	0.439	2/25	0.468	4/25	0.0063803	0/25	1.000
		80	19/24	0.870	16/24	0.687	19/24	0.068	11/24	0.370	2/24	0.443	3/24	0.038	0/24	1.000
		70	19/24	0.867	16/24	0.687	19/24	0.068	11/24	0.344	2/24	0.440	3/24	0.032	0/24	1.000
		60	17/22	0.887	16/22	0.431	17/22	0.107	11/22	0.232	2/22	0.415	4/22	0.004	0/22	1.000
		50	17/21	0.778	15/21	0.498	17/21	0.062	11/21	0.159	2/21	0.405	2/21	0.136	0/21	1.000
Mainly Beta		100	7/12	0.997	3/12	1.000	2/12	1.000	6/12	0.389	1/12	0.543	0/12	1.000	1/12	0.234
Sandwich		90	7/10	0.961	3/10	0.998	2/10	0.999	4/10	0.633	1/10	0.475	0/10	1.000	1/10	0.196
		80	7/11	0.986	3/11	0.999	2/11	1.000	5/11	0.482	1/11	0.506	0/11	1.000	1/11	0.214
		70	7/10	0.952	3/10	0.998	2/10	0.999	4/10	0.615	1/10	0.471	0/10	1.000	1/10	0.193
		60	7/10	0.945	3/10	0.998	2/10	0.999	4/10	0.623	1/10	0.484	0/10	1.000	1/10	0.196
		50	7/10	0.943	3/10	0.998	2/10	0.999	4/10	0.604	1/10	0.493	0/10	1.000	1/10	0.199
Mainly Beta		100	5/5	0.478	1/5	0.998	0/5	1.000	1/5	0.935	1/5	0.278	2/5	0.009	0/5	1.000
Ribbon		90	4/4	0.548	1/4	0.992	0/4	1.000	1/4	0.876	1/4	0.227	1/4	0.118	0/4	1.000
		80	0/0	1.000	0/0	1.000	0/0	1.000	0/0	1.000	0/0	1.000	0/0	1.000	0/0	1.000
		70	1/1	0.852	0/1	1.000	0/1	1.000	0/1	1.000	0/1	1.000	0/1	1.000	0/1	1.000
		60	0/0	1.000	0/0	1.000	0/0	1.000	0/0	1.000	0/0	1.000	0/0	1.000	0/0	1.000
		50	0/0	1.000	0/0	1.000	0/0	1.000	0/0	1.000	0/0	1.000	0/0	1.000	0/0	1.000
Few 2ndary Structures		100	8/9	0.644	8/9	0.195	6/9	0.581	9/9	0.000401168	3/9	0.016	0/9	1.000	0/9	1.000
Irregular		90	4/5	0.855	4/5	0.522	3/5	0.738	5/5	0.011	2/5	0.034	0/5	1.000	0/5	1.000
		80	4/4	0.528	4/4	0.226	3/4	0.523	4/4	0.027	2/4	0.021	0/4	1.000	0/4	1.000
		70	4/5	0.838	4/5	0.507	3/5	0.729	5/5	0.010	2/5	0.033	0/5	1.000	0/5	1.000
		60	4/5	0.825	4/5	0.497	3/5	0.723	5/5	0.010	2/5	0.036	0/5	1.000	0/5	1.000
		50	4/5	0.823	4/5	0.501	3/5	0.730	5/5	0.0094563	2/5	0.037	0/5	1.000	0/5	1.000
M/N		100	2641/3061		2141/3061		1956/3061		1286/3061		193/3061		94/3061		67/3061
		90	2043/2374		1655/2374		1503/2374		964/2374		148/2374		73/2374		51/2374
		80	1777/2081		1437/2084		1308/2084		845/2084		129/2084		66/2084		45/2084
		70	1647/1934		1334/1934		1214/1934		771/1934		119/1934		57/1934		41/1934
		60	2641/3061		1211/1769		1103/1769		711/1769		113/1769		55/1769		38/1769
		50	2641/3061		1132/1648		1035/1648		650/1648		108/1648		51/1648		36/1648
