# Supplementary material for: Structural and Functional Enrichment Analyses for Antimicrobial Peptides
Source: Preprints.org preprint supplement (doi:10.20944/preprints202007.0438.v1), 2020-07-19
Supplement: Supplementary file 2 [file TablesS2.xlsx]

## Sheet: TableS2.EnrichedStructure(CATH)
CATH		Identity	Antibacterial		AntigramP		AntigramN		Antifungal		Antiviral		Antiparasitic		Anticancer
		%	m/n	p	m/n	p	m/n	p	m/n	p	m/n	p	m/n	p	m/n	p	M/N
Alpha Beta		100	44/176	1.000	34/131	1.000	25/123	1.000	72/127	6.53e-07	5/16	0.868	2/11	0.978	7/9	0.028	106/256
2-Layer Sandwich		90	24/121	1.000	22/95	0.992	17/88	1.000	30/68	0.000475378	4/13	0.575	0/7	1.000	3/4	0.079	46/155
		80	18/106	1.000	17/83	0.993	12/79	1.000	27/64	0.000319213	4/12	0.431	1/6	0.861	2/3	0.184	38/138
		70	16/103	1.000	14/79	0.987	10/75	1.000	21/57	0.0020757	4/12	0.311	2/7	0.530	1/2	0.421	31/130
		60	13/90	1.000	11/70	0.995	8/66	1.000	19/55	0.0058386	4/12	0.292	2/8	0.596	0/1	1.000	27/116
		50	11/84	1.000	9/67	0.999	8/64	1.000	18/53	0.0070334	3/11	0.484	2/6	0.418	0/1	1.000	25/109
Alpha Beta		100	25/176	0.000	18/131	0.023	22/123	0.000	10/127	0.889	2/16	0.478	0/11	1.000	0/9	1.000	25/256
Roll		90	15/121	0.020	12/95	0.096	13/88	0.011	5/68	0.873	1/13	0.749	0/7	1.000	0/4	1.000	15/155
		80	15/106	0.015	11/83	0.206	13/79	0.012	5/64	0.912	1/12	0.764	0/6	1.000	0/3	1.000	15/138
		70	15/103	0.024	11/79	0.221	13/75	0.013	5/57	0.876	1/12	0.786	0/7	1.000	0/2	1.000	15/130
		60	12/90	0.040	8/70	0.443	10/66	0.046	5/55	0.765	1/12	0.749	0/8	1.000	0/1	1.000	12/116
		50	11/84	0.048	8/67	0.322	10/64	0.020	3/53	0.967	1/11	0.708	0/6	1.000	0/1	1.000	11/109
Alpha Beta		100	7/176	0.427	5/131	0.529	7/123	0.069	4/127	0.742	2/16	0.102	0/11	1.000	0/9	1.000	9/256
3-Layer Sandwich		90	7/121	0.688	5/95	0.766	7/88	0.168	4/68	0.616	2/13	0.167	0/7	1.000	0/4	1.000	9/155
	(aba)	80	7/106	0.653	5/83	0.743	7/79	0.175	4/64	0.676	2/12	0.177	0/6	1.000	0/3	1.000	9/138
		70	7/103	0.721	5/79	0.756	7/75	0.182	4/57	0.616	2/12	0.195	0/7	1.000	0/2	1.000	9/130
		60	6/90	0.746	4/70	0.840	6/66	0.246	4/55	0.582	2/12	0.193	0/8	1.000	0/1	1.000	8/116
		50	7/84	0.661	5/67	0.772	7/64	0.197	4/53	0.727	2/11	0.225	0/6	1.000	0/1	1.000	9/109
Mainly Alpha		100	37/176	0.000	26/131	0.026	26/123	0.009	11/127	0.999	0/16	1.000	3/11	0.225	1/9	0.780	39/256
Orthogonal Bundle		90	23/121	0.014	18/95	0.100	16/88	0.201	8/68	0.914	0/13	1.000	2/7	0.296	0/4	1.000	24/155
		80	21/106	0.016	16/83	0.140	15/79	0.186	8/64	0.897	0/12	1.000	2/6	0.244	0/3	1.000	22/138
		70	20/103	0.036	15/79	0.199	13/75	0.430	7/57	0.905	0/12	1.000	2/7	0.315	0/2	1.000	21/130
		60	18/90	0.039	14/70	0.148	13/66	0.197	7/55	0.897	0/12	1.000	2/8	0.388	0/1	1.000	19/116
		50	17/84	0.044	15/67	0.031	11/64	0.518	8/53	0.740	0/11	1.000	2/6	0.257	0/1	1.000	18/109
Mainly Alpha		100	22/176	0.001	18/131	0.005	14/123	0.142	0/127	1.000	0/16	1.000	0/11	1.000	0/9	1.000	23/256
Up-down Bundle		90	17/121	0.011	13/95	0.135	10/88	0.535	0/68	1.000	0/13	1.000	0/7	1.000	0/4	1.000	17/155
		80	15/106	0.015	11/83	0.206	8/79	0.728	0/64	1.000	0/12	1.000	0/6	1.000	0/3	1.000	15/138
		70	14/103	0.031	11/79	0.123	8/75	0.633	0/57	1.000	0/12	1.000	0/7	1.000	0/2	1.000	14/130
		60	13/90	0.030	10/70	0.160	7/66	0.705	0/55	1.000	0/12	1.000	0/8	1.000	0/1	1.000	13/116
		50	10/84	0.065	8/67	0.180	6/64	0.604	0/53	1.000	0/11	1.000	0/6	1.000	0/1	1.000	10/109
Mainly Beta		100	21/176	0.300	18/131	0.101	21/123	0.002	14/127	0.562	2/16	0.542	4/11	0.022	0/9	1.000	28/256
Beta Barrel		90	20/121	0.517	17/95	0.302	20/88	0.008	11/68	0.579	2/13	0.656	4/7	0.013	0/4	1.000	25/155
		80	19/106	0.499	16/83	0.316	19/79	0.013	11/64	0.610	2/12	0.656	3/6	0.065	0/3	1.000	24/138
		70	19/103	0.625	16/79	0.339	19/75	0.015	11/57	0.502	2/12	0.692	3/7	0.117	0/2	1.000	24/130
		60	17/90	0.637	16/70	0.140	17/66	0.026	11/55	0.486	2/12	0.710	4/8	0.041	0/1	1.000	22/116
		50	17/84	0.440	15/67	0.215	17/64	0.018	11/53	0.444	2/11	0.670	2/6	0.326	0/1	1.000	21/109
Mainly Beta		100	7/176	0.867	3/131	0.986	2/123	0.996	6/127	0.605	1/16	0.547	0/11	1.000	1/9	0.355	12/256
Sandwich		90	7/121	0.850	3/95	0.992	2/88	0.998	4/68	0.717	1/13	0.595	0/7	1.000	1/4	0.236	10/155
		80	7/106	0.921	3/83	0.996	2/79	0.999	5/64	0.645	1/12	0.647	0/6	1.000	1/3	0.222	11/138
		70	7/103	0.874	3/79	0.992	2/75	0.998	4/57	0.717	1/12	0.634	0/7	1.000	1/2	0.148	10/130
		60	7/90	0.842	3/70	0.991	2/66	0.998	4/55	0.793	1/12	0.680	0/8	1.000	1/1	0.086	10/116
		50	7/84	0.832	3/67	0.993	2/64	0.999	4/53	0.816	1/11	0.671	0/6	1.000	1/1	0.092	10/109
Mainly Beta		100	5/176	0.151	1/131	0.973	0/123	1.000	1/127	0.969	1/16	0.278	2/11	0.016	0/9	1.000	5/256
Ribbon		90	4/121	0.367	1/95	0.979	0/88	1.000	1/68	0.904	1/13	0.298	1/7	0.170	0/4	1.000	4/155
		80	0/106	1.000	0/83	1.000	0/79	1.000	0/64	1.000	0/12	1.000	0/6	1.000	0/3	1.000	0/138
		70	1/103	0.792	0/79	1.000	0/75	1.000	0/57	1.000	0/12	1.000	0/7	1.000	0/2	1.000	1/130
		60	0/90	1.000	0/70	1.000	0/66	1.000	0/55	1.000	0/12	1.000	0/8	1.000	0/1	1.000	0/116
		50	0/84	1.000	0/67	1.000	0/64	1.000	0/53	1.000	0/11	1.000	0/6	1.000	0/1	1.000	0/109
Few 2ndary Structures		100	8/176	0.170	8/131	0.021	6/123	0.213	9/127	0.002	3/16	0.013	0/11	1.000	0/9	1.000	9/256
Irregular		90	4/121	0.698	4/95	0.356	3/88	0.627	5/68	0.015	2/13	0.056	0/7	1.000	0/4	1.000	5/155
		80	4/106	0.343	4/83	0.127	3/79	0.426	4/64	0.044	2/12	0.038	0/6	1.000	0/3	1.000	4/138
		70	4/103	0.723	4/79	0.346	3/75	0.644	5/57	0.015	2/12	0.067	0/7	1.000	0/2	1.000	5/130
		60	4/90	0.688	4/70	0.338	3/66	0.630	5/55	0.022	2/12	0.083	0/8	1.000	0/1	1.000	5/116
		50	4/84	0.677	4/67	0.358	3/64	0.663	5/53	0.025	2/11	0.079	0/6	1.000	0/1	1.000	5/109
