# Supplementary material for: Structural and Functional Enrichment Analyses for Antimicrobial Peptides
Source: Preprints.org preprint supplement (doi:10.20944/preprints202007.0438.v1), 2020-07-19
Supplement: Supplementary file 3 [file TablesS3.xlsx]

## Sheet: TableS3.EnrichedFunction(SCOP)
SCOP		Identity	Antibacterial		AntigramP		AntigramN		Antifungal		Antiviral		Antiparasitic		Anticancer
		%	m/n	p	m/n	p	m/n	p	m/n	p	m/n	p	m/n	p	m/n	p
All alpha proteins		100	5/5	0.478	1/5	0.998	4/5	0.407	1/5	0.935	0/5	1.000	0/5	1.000	0/5	1.000
Bifunctional inhibitor		90	3/3	0.637	1/3	0.972	2/3	0.695	1/3	0.791	0/3	1.000	0/3	1.000	0/3	1.000
		80	3/3	0.620	1/3	0.970	2/3	0.687	1/3	0.790	0/3	1.000	0/3	1.000	0/3	1.000
		70	3/3	0.617	1/3	0.970	2/3	0.687	1/3	0.783	0/3	1.000	0/3	1.000	0/3	1.000
		60	3/3	0.602	1/3	0.969	2/3	0.682	1/3	0.786	0/3	1.000	0/3	1.000	0/3	1.000
		50	2/2	0.711	1/2	0.902	1/2	0.862	1/2	0.633	0/2	1.000	0/2	1.000	0/2	1.000
All alpha proteins		100	5/5	0.478	2/5	0.969	3/5	0.748	0/5	1.000	0/5	1.000	0/5	1.000	0/5	1.000
Phospholipase		90	3/3	0.637	1/3	0.972	2/3	0.695	0/3	1.000	0/3	1.000	0/3	1.000	0/3	1.000
		80	3/3	0.620	1/3	0.970	2/3	0.687	0/3	1.000	0/3	1.000	0/3	1.000	0/3	1.000
		70	3/3	0.617	2/3	0.771	2/3	0.687	0/3	1.000	0/3	1.000	0/3	1.000	0/3	1.000
		60	3/3	0.602	2/3	0.764	2/3	0.682	0/3	1.000	0/3	1.000	0/3	1.000	0/3	1.000
		50	1/1	0.843	1/1	0.687	1/1	0.628	0/1	1.000	0/1	1.000	0/1	1.000	0/1	1.000
All alpha proteins		100	8/10	0.853	10/10	0.028	9/10	0.075	3/10	0.863	0/10	1.000	2/10	0.035	1/10	0.199
Saposin-like		90	6/6	0.406	6/6	0.114	6/6	0.064	2/6	0.776	0/6	1.000	1/6	0.171	0/6	1.000
		80	6/6	0.384	6/6	0.107	6/6	0.060	2/6	0.776	0/6	1.000	1/6	0.176	0/6	1.000
		70	6/6	0.381	6/6	0.107	6/6	0.060	2/6	0.765	0/6	1.000	1/6	0.165	0/6	1.000
		60	6/6	0.362	6/6	0.103	6/6	0.058	2/6	0.770	0/6	1.000	1/6	0.173	0/6	1.000
		50	6/6	0.359	6/6	0.105	6/6	0.061	2/6	0.758	0/6	1.000	1/6	0.172	0/6	1.000
α and β proteins (a/b)		100	5/5	0.478	4/5	0.527	5/5	0.106	2/5	0.697	1/5	0.278	0/5	1.000	0/5	1.000
Periplasmic binding		90	5/5	0.472	4/5	0.522	5/5	0.101	2/5	0.674	1/5	0.275	0/5	1.000	0/5	1.000
protein-like II		80	5/5	0.450	4/5	0.507	5/5	0.097	2/5	0.673	1/5	0.274	0/5	1.000	0/5	1.000
		70	5/5	0.448	4/5	0.507	5/5	0.097	2/5	0.661	1/5	0.272	0/5	1.000	0/5	1.000
		60	4/4	0.508	3/4	0.624	4/4	0.151	2/4	0.528	1/4	0.232	0/4	1.000	0/4	1.000
		50	5/5	0.426	4/5	0.501	5/5	0.097	2/5	0.654	1/5	0.288	0/5	1.000	0/5	1.000
α and β proteins (a+b)		100	16/17	0.301	14/17	0.200	16/17	0.005	5/17	0.906	1/17	0.670	4/17	0.0014604	0/17	1.000
IL8-like		90	15/16	0.324	13/16	0.237	15/16	0.006	4/16	0.941	1/16	0.644	4/16	0.001132	0/16	1.000
		80	14/15	0.328	12/15	0.266	14/15	0.008	4/15	0.917	1/15	0.618	3/15	0.011	0/15	1.000
		70	14/15	0.324	12/15	0.267	14/15	0.008	4/15	0.909	1/15	0.616	3/15	0.0085885	0/15	1.000
		60	12/13	0.376	12/13	0.050	12/13	0.018	4/13	0.836	1/13	0.577	4/13	0.000486058	0/13	1.000
		50	12/12	0.129	11/12	0.071	12/12	0.003	4/12	0.763	1/12	0.558	2/12	0.051	0/12	1.000
α and β proteins (a+b)		100	8/8	0.307	7/8	0.254	5/8	0.683	2/8	0.913	0/8	1.000	0/8	1.000	0/8	1.000
Lysozyme-like		90	6/6	0.406	5/6	0.414	3/6	0.864	1/6	0.956	0/6	1.000	0/6	1.000	0/6	1.000
		80	5/5	0.450	4/5	0.507	3/5	0.729	1/5	0.926	0/5	1.000	0/5	1.000	0/5	1.000
		70	3/3	0.617	2/3	0.771	1/3	0.949	0/3	1.000	0/3	1.000	0/3	1.000	0/3	1.000
		60	1/1	0.845	1/1	0.685	1/1	0.624	0/1	1.000	0/1	1.000	0/1	1.000	0/1	1.000
		50	2/2	0.711	2/2	0.472	1/2	0.862	1/2	0.633	0/2	1.000	0/2	1.000	0/2	1.000
α and β proteins (a+b)		100	1/1	0.863	1/1	0.699	0/1	1.000	1/1	0.420	0/1	1.000	0/1	1.000	0/1	1.000
RNase A-like		90	1/1	0.861	1/1	0.697	0/1	1.000	1/1	0.406	0/1	1.000	0/1	1.000	0/1	1.000
		80	1/1	0.853	1/1	0.690	0/1	1.000	1/1	0.405	0/1	1.000	0/1	1.000	0/1	1.000
		70	1/1	0.852	1/1	0.690	0/1	1.000	1/1	0.399	0/1	1.000	0/1	1.000	0/1	1.000
		60	1/1	0.845	1/1	0.685	0/1	1.000	1/1	0.402	0/1	1.000	0/1	1.000	0/1	1.000
		50	1/1	0.843	1/1	0.687	0/1	1.000	1/1	0.394	0/1	1.000	0/1	1.000	0/1	1.000
Peptides		100	6/6	0.412	5/6	0.419	6/6	0.067	5/6	0.050	0/6	1.000	0/6	1.000	0/6	1.000
Antimicrobial		90	6/6	0.406	5/6	0.414	6/6	0.064	5/6	0.043	0/6	1.000	0/6	1.000	0/6	1.000
	beta-hairpin	80	5/5	0.450	5/5	0.156	5/5	0.097	5/5	0.010	0/5	1.000	0/5	1.000	0/5	1.000
		70	4/4	0.526	4/4	0.226	4/4	0.155	4/4	0.025	0/4	1.000	0/4	1.000	0/4	1.000
		60	4/4	0.508	4/4	0.219	4/4	0.151	4/4	0.026	0/4	1.000	0/4	1.000	0/4	1.000
		50	4/4	0.506	4/4	0.222	4/4	0.155	4/4	0.024	0/4	1.000	0/4	1.000	0/4	1.000
Peptides		100	9/9	0.264	6/9	0.729	6/9	0.581	1/9	0.993	1/9	0.444	1/9	0.245	0/9	1.000
Antimicrobial helix		90	5/5	0.472	4/5	0.522	4/5	0.396	1/5	0.926	1/5	0.275	1/5	0.145	0/5	1.000
		80	5/5	0.450	4/5	0.507	4/5	0.386	1/5	0.926	1/5	0.274	1/5	0.149	0/5	1.000
		70	5/5	0.448	4/5	0.507	4/5	0.386	0/5	1.000	0/5	1.000	0/5	1.000	0/5	1.000
		60	4/4	0.508	3/4	0.624	3/4	0.516	0/4	1.000	0/4	1.000	0/4	1.000	0/4	1.000
		50	4/4	0.506	3/4	0.629	3/4	0.524	0/4	1.000	0/4	1.000	0/4	1.000	0/4	1.000
Peptides		100	6/6	0.412	5/6	0.419	2/6	0.974	0/6	1.000	0/6	1.000	0/6	1.000	0/6	1.000
Leucocin-like		90	5/5	0.472	4/5	0.522	1/5	0.993	0/5	1.000	0/5	1.000	0/5	1.000	0/5	1.000
	bacteriocin	80	5/5	0.450	4/5	0.507	1/5	0.993	0/5	1.000	0/5	1.000	0/5	1.000	0/5	1.000
		70	4/4	0.526	3/4	0.634	1/4	0.981	0/4	1.000	0/4	1.000	0/4	1.000	0/4	1.000
		60	4/4	0.508	3/4	0.624	1/4	0.980	0/4	1.000	0/4	1.000	0/4	1.000	0/4	1.000
		50	3/3	0.600	2/3	0.767	1/3	0.949	0/3	1.000	0/3	1.000	0/3	1.000	0/3	1.000
Peptides		100	8/8	0.307	8/8	0.057	7/8	0.153	2/8	0.913	0/8	1.000	0/8	1.000	0/8	1.000
Peptide hormones		90	4/4	0.548	4/4	0.236	3/4	0.533	2/4	0.535	0/4	1.000	0/4	1.000	0/4	1.000
		80	4/4	0.528	4/4	0.226	3/4	0.523	2/4	0.534	0/4	1.000	0/4	1.000	0/4	1.000
		70	4/4	0.526	4/4	0.226	3/4	0.524	2/4	0.523	0/4	1.000	0/4	1.000	0/4	1.000
		60	4/4	0.508	4/4	0.219	3/4	0.516	2/4	0.528	0/4	1.000	0/4	1.000	0/4	1.000
		50	4/4	0.506	4/4	0.222	3/4	0.524	2/4	0.515	0/4	1.000	0/4	1.000	0/4	1.000
Peptides		100	2/4	0.991	2/4	0.916	0/4	1.000	1/4	0.887	4/4	1.53477e-05	0/4	1.000	0/4	1.000
RP71935		90	0/1	1.000	0/1	1.000	0/1	1.000	0/1	1.000	1/1	0.062	0/1	1.000	0/1	1.000
		80	0/1	1.000	0/1	1.000	0/1	1.000	0/1	1.000	1/1	0.061	0/1	1.000	0/1	1.000
		70	0/1	1.000	0/1	1.000	0/1	1.000	0/1	1.000	1/1	0.061	0/1	1.000	0/1	1.000
		60	0/1	1.000	0/1	1.000	0/1	1.000	0/1	1.000	1/1	0.063	0/1	1.000	0/1	1.000
		50	0/1	1.000	0/1	1.000	0/1	1.000	0/1	1.000	1/1	0.065	0/1	1.000	0/1	1.000
Small proteins		100	4/10	1.000	3/10	0.998	3/10	0.994	2/10	0.965	0/10	1.000	0/10	1.000	7/10	2e-10
Crambin-like		90	4/6	0.961	3/6	0.927	3/6	0.864	2/6	0.776	0/6	1.000	0/6	1.000	3/6	0.000179
		80	2/3	0.941	2/3	0.771	2/3	0.687	1/3	0.790	0/3	1.000	0/3	1.000	2/3	0.00135
		70	2/2	0.725	2/2	0.476	2/2	0.394	1/2	0.639	0/2	1.000	0/2	1.000	1/2	0.042
		60	0/0	1.000	0/0	1.000	0/0	1.000	0/0	1.000	0/0	1.000	0/0	1.000	0/0	1.000
		50	0/0	1.000	0/0	1.000	0/0	1.000	0/0	1.000	0/0	1.000	0/0	1.000	0/0	1.000
Small proteins		100	14/14	0.126	12/14	0.159	13/14	0.016	8/14	0.189	4/14	0.0092936	0/14	1.000	0/14	1.000
Defensin-like		90	8/8	0.300	7/8	0.249	8/8	0.025	4/8	0.420	2/8	0.084	0/8	1.000	0/8	1.000
		80	7/7	0.327	6/7	0.307	7/7	0.038	3/7	0.592	1/7	0.361	0/7	1.000	0/7	1.000
		70	7/7	0.324	6/7	0.308	7/7	0.038	3/7	0.577	1/7	0.359	0/7	1.000	0/7	1.000
		60	6/6	0.362	5/6	0.387	6/6	0.058	3/6	0.460	1/6	0.327	0/6	1.000	0/6	1.000
		50	5/5	0.426	4/5	0.501	5/5	0.097	2/5	0.654	1/5	0.288	0/5	1.000	0/5	1.000
Small proteins		100	45/109	1.000	29/109	1.000	19/109	1.000	68/109	7.69e-08	11/109	0.079	4/109	0.433	2/109	0.697
Knottins		90	18/41	1.000	14/41	1.000	10/41	1.000	23/41	0.000875	6/41	0.039	2/41	0.361	1/41	0.593
		80	11/29	1.000	10/29	1.000	7/29	1.000	21/29	0.000472	2/29	0.545	1/29	0.609	1/29	0.471
		70	11/24	1.000	9/24	1.000	7/24	1.000	18/24	0.000477	2/24	0.440	1/24	0.514	0/24	1.000
		60	8/21	1.000	8/21	0.999	5/21	1.000	16/21	0.000833	2/21	0.392	1/21	0.487	0/21	1.000
		50	8/21	1.000	8/21	0.999	6/21	1.000	17/21	0.000115	1/21	0.761	1/21	0.485	1/21	0.373
M/N		100	2641/3061		2141/3061		1956/3061		1286/3061		193/3061		94/3061		67/3061
		90	2043/2374		1655/2374		1503/2374		964/2374		148/2374		73/2374		51/2374
		80	1777/2081		1437/2084		1308/2084		845/2084		129/2084		66/2084		45/2084
		70	1647/1934		1334/1934		1214/1934		771/1934		119/1934		57/1934		41/1934
		60	2641/3061		1211/1769		1103/1769		711/1769		113/1769		55/1769		38/1769
		50	2641/3061		1132/1648		1035/1648		650/1648		108/1648		51/1648		36/1648
