# Supplementary material for: Structural and Functional Enrichment Analyses for Antimicrobial Peptides
Source: Preprints.org preprint supplement (doi:10.20944/preprints202007.0438.v1), 2020-07-19
Supplement: Supplementary file 4 [file TablesS4.xlsx]

## Sheet: TableS4.EnrichedStructure(SCOP)
SCOP		Identity	Antibacterial		AntigramP		AntigramN		Antifungal		Antiviral		Antiparasitic		Anticancer
		%	m/n	p	m/n	p	m/n	p	m/n	p	m/n	p	m/n	p	m/n	p	M/N
All alpha proteins		100	5/145	0.132	1/111	0.974	4/100	0.141	1/106	0.962	0/22	1.000	0/11	1.000	0/10	1.000	5/217
Bifunctional inhibitor		90	3/91	0.479	1/74	0.955	2/70	0.654	1/52	0.836	0/12	1.000	0/8	1.000	0/4	1.000	3/116
		80	3/76	0.477	1/64	0.963	2/61	0.691	1/44	0.841	0/7	1.000	0/6	1.000	0/3	1.000	3/97
		70	3/72	0.563	1/60	0.972	2/58	0.743	1/38	0.826	0/6	1.000	0/5	1.000	0/1	1.000	3/87
		60	3/60	0.507	1/53	0.977	2/49	0.726	1/35	0.854	0/6	1.000	0/6	1.000	0/0	1.000	3/75
		50	2/57	0.642	1/51	0.924	1/48	0.898	1/36	0.761	0/5	1.000	0/4	1.000	0/1	1.000	2/71
All alpha proteins		100	5/145	0.132	2/111	0.833	3/100	0.429	0/106	1.000	0/22	1.000	0/11	1.000	0/10	1.000	5/217
Phospholipase		90	3/91	0.479	1/74	0.955	2/70	0.654	0/52	1.000	0/12	1.000	0/8	1.000	0/4	1.000	3/116
		80	3/76	0.477	1/64	0.963	2/61	0.691	0/44	1.000	0/7	1.000	0/6	1.000	0/3	1.000	3/97
		70	3/72	0.563	2/60	0.774	2/58	0.743	0/38	1.000	0/6	1.000	0/5	1.000	0/1	1.000	3/87
		60	3/60	0.507	2/53	0.796	2/49	0.726	0/35	1.000	0/6	1.000	0/6	1.000	0/0	1.000	3/75
		50	1/57	0.803	1/51	0.718	1/48	0.676	0/36	1.000	0/5	1.000	0/4	1.000	0/1	1.000	1/71
All alpha proteins		100	8/145	0.301	10/111	0.001	9/100	0.005	3/106	0.931	0/22	1.000	2/11	0.088	1/10	0.390	10/217
Saposin-like		90	6/91	0.225	6/74	0.062	6/70	0.044	2/52	0.841	0/12	1.000	1/8	0.355	0/4	1.000	6/116
		80	6/76	0.221	6/64	0.076	6/61	0.056	2/44	0.849	0/7	1.000	1/6	0.325	0/3	1.000	6/97
		70	6/72	0.309	6/60	0.099	6/58	0.080	2/38	0.829	0/6	1.000	1/5	0.307	0/1	1.000	6/87
		60	6/60	0.249	6/53	0.114	6/49	0.069	2/35	0.867	0/6	1.000	1/6	0.405	0/0	1.000	6/75
		50	6/57	0.253	6/51	0.126	6/48	0.086	2/36	0.907	0/5	1.000	1/4	0.303	0/1	1.000	6/71
α and β proteins (a/b)		100	5/145	0.132	4/111	0.203	5/100	0.020	2/106	0.785	1/22	0.425	0/11	1.000	0/10	1.000	5/217
Periplasmic binding		90	5/91	0.290	4/74	0.402	5/70	0.075	2/52	0.746	1/12	0.427	0/8	1.000	0/4	1.000	5/116
protein-like II		80	5/76	0.287	4/64	0.444	5/61	0.092	2/44	0.756	1/7	0.318	0/6	1.000	0/3	1.000	5/97
		70	5/72	0.379	4/60	0.504	5/58	0.124	2/38	0.730	1/6	0.307	0/5	1.000	0/1	1.000	5/87
		60	4/60	0.401	3/53	0.665	4/49	0.174	2/35	0.640	1/6	0.289	0/6	1.000	0/0	1.000	4/75
		50	5/57	0.322	4/51	0.564	5/48	0.132	2/36	0.830	1/5	0.314	0/4	1.000	0/1	1.000	5/71
α and βproteins (a+b)		100	16/145	0.008	14/111	0.007	16/100	0.000	5/106	0.968	1/22	0.856	4/11	0.007	0/10	1.000	17/217
IL8-like		90	15/91	0.094	13/74	0.097	15/70	0.002	4/52	0.979	1/12	0.847	4/8	0.012	0/4	1.000	16/116
		80	14/76	0.112	12/64	0.172	14/61	0.006	4/44	0.971	1/7	0.704	3/6	0.046	0/3	1.000	15/97
		70	14/72	0.214	12/60	0.244	14/58	0.012	4/38	0.962	1/6	0.691	3/5	0.034	0/1	1.000	15/87
		60	12/60	0.207	12/53	0.053	12/49	0.021	4/35	0.944	1/6	0.695	4/6	0.007	0/0	1.000	13/75
		50	12/57	0.055	11/51	0.087	12/48	0.005	4/36	0.950	1/5	0.615	2/4	0.130	0/1	1.000	12/71
α and β proteins (a+b)		100	8/145	0.038	7/111	0.039	5/100	0.281	2/106	0.956	0/22	1.000	0/11	1.000	0/10	1.000	8/217
Lysozyme-like		90	6/91	0.225	5/74	0.290	3/70	0.832	1/52	0.975	0/12	1.000	0/8	1.000	0/4	1.000	6/116
		80	5/76	0.287	4/64	0.444	3/61	0.736	1/44	0.955	0/7	1.000	0/6	1.000	0/3	1.000	5/97
		70	3/72	0.563	2/60	0.774	1/58	0.966	0/38	1.000	0/6	1.000	0/5	1.000	0/1	1.000	3/87
		60	1/60	0.800	1/53	0.707	1/49	0.653	0/35	1.000	0/6	1.000	0/6	1.000	0/0	1.000	1/75
		50	2/57	0.642	2/51	0.513	1/48	0.898	1/36	0.761	0/5	1.000	0/4	1.000	0/1	1.000	2/71
α and β proteins (a+b)		100	1/145	0.670	1/111	0.514	0/100	1.000	1/106	0.476	0/22	1.000	0/11	1.000	0/10	1.000	1/217
RNase A-like		90	1/91	0.784	1/74	0.638	0/70	1.000	1/52	0.448	0/12	1.000	0/8	1.000	0/4	1.000	1/116
		80	1/76	0.784	1/64	0.660	0/61	1.000	1/44	0.454	0/7	1.000	0/6	1.000	0/3	1.000	1/97
		70	1/72	0.828	1/60	0.690	0/58	1.000	1/38	0.437	0/6	1.000	0/5	1.000	0/1	1.000	1/87
		60	1/60	0.800	1/53	0.707	0/49	1.000	1/35	0.467	0/6	1.000	0/6	1.000	0/0	1.000	1/75
		50	1/57	0.803	1/51	0.718	0/48	1.000	1/36	0.507	0/5	1.000	0/4	1.000	0/1	1.000	1/71
Peptides		100	6/145	0.087	5/111	0.120	6/100	0.009	5/106	0.086	0/22	1.000	0/11	1.000	0/10	1.000	6/217
Antimicrobial		90	6/91	0.225	5/74	0.290	6/70	0.044	5/52	0.063	0/12	1.000	0/8	1.000	0/4	1.000	6/116
	beta-hairpin	80	5/76	0.287	5/64	0.118	5/61	0.092	5/44	0.017	0/7	1.000	0/6	1.000	0/3	1.000	5/97
		70	4/72	0.462	4/60	0.219	4/58	0.191	4/38	0.033	0/6	1.000	0/5	1.000	0/1	1.000	4/87
		60	4/60	0.401	4/53	0.241	4/49	0.174	4/35	0.043	0/6	1.000	0/6	1.000	0/0	1.000	4/75
		50	4/57	0.407	4/51	0.257	4/48	0.200	4/36	0.061	0/5	1.000	0/4	1.000	0/1	1.000	4/71
Peptides		100	9/145	0.025	6/111	0.278	6/100	0.180	1/106	0.997	1/22	0.634	1/11	0.387	0/10	1.000	9/217
	Antimicrobial helix	90	5/91	0.290	4/74	0.402	4/70	0.338	1/52	0.952	1/12	0.427	1/8	0.305	0/4	1.000	5/116
		80	5/76	0.287	4/64	0.444	4/61	0.384	1/44	0.955	1/7	0.318	1/6	0.278	0/3	1.000	5/97
		70	5/72	0.379	4/60	0.504	4/58	0.457	0/38	1.000	0/6	1.000	0/5	1.000	0/1	1.000	5/87
		60	4/60	0.401	3/53	0.665	3/49	0.568	0/35	1.000	0/6	1.000	0/6	1.000	0/0	1.000	4/75
		50	4/57	0.407	3/51	0.686	3/48	0.610	0/36	1.000	0/5	1.000	0/4	1.000	0/1	1.000	4/71
Peptides		100	6/145	0.087	5/111	0.120	2/100	0.855	0/106	1.000	0/22	1.000	0/11	1.000	0/10	1.000	6/217
Leucocin-like		90	5/91	0.290	4/74	0.402	1/70	0.991	0/52	1.000	0/12	1.000	0/8	1.000	0/4	1.000	5/116
	bacteriocin	80	5/76	0.287	4/64	0.444	1/61	0.994	0/44	1.000	0/7	1.000	0/6	1.000	0/3	1.000	5/97
		70	4/72	0.462	3/60	0.634	1/58	0.989	0/38	1.000	0/6	1.000	0/5	1.000	0/1	1.000	4/87
		60	4/60	0.401	3/53	0.665	1/49	0.988	0/35	1.000	0/6	1.000	0/6	1.000	0/0	1.000	4/75
		50	3/57	0.512	2/51	0.811	1/48	0.969	0/36	1.000	0/5	1.000	0/4	1.000	0/1	1.000	3/71
Peptides		100	8/145	0.038	8/111	0.004	7/100	0.020	2/106	0.956	0/22	1.000	0/11	1.000	0/10	1.000	8/217
	Peptide hormones	90	4/91	0.373	4/74	0.161	3/70	0.480	2/52	0.609	0/12	1.000	0/8	1.000	0/4	1.000	4/116
		80	4/76	0.370	4/64	0.183	3/61	0.525	2/44	0.618	0/7	1.000	0/6	1.000	0/3	1.000	4/97
		70	4/72	0.462	4/60	0.219	3/58	0.593	2/38	0.590	0/6	1.000	0/5	1.000	0/1	1.000	4/87
		60	4/60	0.401	4/53	0.241	3/49	0.568	2/35	0.640	0/6	1.000	0/6	1.000	0/0	1.000	4/75
		50	4/57	0.407	4/51	0.257	3/48	0.610	2/36	0.704	0/5	1.000	0/4	1.000	0/1	1.000	4/71
Peptides		100	2/145	0.894	2/111	0.710	0/100	1.000	1/106	0.927	4/22	8.94e-05	0/11	1.000	0/10	1.000	4/217
	RP71935	90	0/91	1.000	0/74	1.000	0/70	1.000	0/52	1.000	1/12	0.103	0/8	1.000	0/4	1.000	1/116
		80	0/76	1.000	0/64	1.000	0/61	1.000	0/44	1.000	1/7	0.072	0/6	1.000	0/3	1.000	1/97
		70	0/72	1.000	0/60	1.000	0/58	1.000	0/38	1.000	1/6	0.069	0/5	1.000	0/1	1.000	1/87
		60	0/60	1.000	0/53	1.000	0/49	1.000	0/35	1.000	1/6	0.080	0/6	1.000	0/0	1.000	1/75
		50	0/57	1.000	0/51	1.000	0/48	1.000	0/36	1.000	1/5	0.070	0/4	1.000	0/1	1.000	1/71
Small proteins		100	4/145	0.984	3/111	0.958	3/100	0.919	2/106	0.986	0/22	1.000	0/11	1.000	7/10	4.01e-09	10/217
	Crambin-like	90	4/91	0.887	3/74	0.875	3/70	0.832	2/52	0.841	0/12	1.000	0/8	1.000	3/4	0.000309347	6/116
		80	2/76	0.883	2/64	0.734	2/61	0.691	1/44	0.841	0/7	1.000	0/6	1.000	2/3	0.002	3/97
		70	2/72	0.683	2/60	0.473	2/58	0.442	1/38	0.686	0/6	1.000	0/5	1.000	1/1	0.023	2/87
		60	0/60	1.000	0/53	1.000	0/49	1.000	0/35	1.000	0/6	1.000	0/6	1.000	0/0	1.000	0/75
		50	0/57	1.000	0/51	1.000	0/48	1.000	0/36	1.000	0/5	1.000	0/4	1.000	0/1	1.000	0/71
Small proteins		100	14/145	0.003	12/111	0.007	13/100	0.000	8/106	0.323	4/22	0.044	0/11	1.000	0/10	1.000	14/217
	Defensin-like	90	8/91	0.134	7/74	0.143	8/70	0.015	4/52	0.520	2/12	0.193	0/8	1.000	0/4	1.000	8/116
		80	7/76	0.170	6/64	0.241	7/61	0.034	3/44	0.698	1/7	0.418	0/6	1.000	0/3	1.000	7/97
		70	7/72	0.252	6/60	0.297	7/58	0.052	3/38	0.665	1/6	0.405	0/5	1.000	0/1	1.000	7/87
		60	6/60	0.249	5/53	0.428	6/49	0.069	3/35	0.597	1/6	0.405	0/6	1.000	0/0	1.000	6/75
		50	5/57	0.322	4/51	0.564	5/48	0.132	2/36	0.830	1/5	0.314	0/4	1.000	0/1	1.000	5/71
Small proteins		100	48/145	1.000	31/111	1.000	21/100	1.000	73/106	3.1e-07	11/22	0.552	4/11	0.880	2/10	0.989	109/217
	Knottins	90	20/91	1.000	16/74	1.000	12/70	1.000	27/52	0.000730057	6/12	0.209	2/8	0.845	1/4	0.830	41/116
		80	11/76	1.000	10/64	1.000	7/61	1.000	21/44	0.000492	2/7	0.677	1/6	0.889	1/3	0.660	29/97
		70	11/72	1.000	9/60	1.000	7/58	1.000	18/38	0.000318	2/6	0.531	1/5	0.810	0/1	1.000	24/87
		60	8/60	1.000	8/53	1.000	5/49	1.000	16/35	0.00149	2/6	0.542	1/6	0.872	0/0	1.000	21/75
		50	8/57	1.000	8/51	1.000	6/48	1.000	17/36	0.000941	1/5	0.837	1/4	0.763	1/1	0.296	21/71
