# Supplementary material for: Structural and Functional Enrichment Analyses for Antimicrobial Peptides
Source: Preprints.org preprint supplement (doi:10.20944/preprints202007.0438.v1), 2020-07-19
Supplement: Supplementary file 5 [file TablesS5.xlsx]

## Sheet: TableS5.EnrichedFunction(TM)
TM	Identity	Antibacterial		AntigramP		AntigramN		Antifungal		Antiviral		Antiparasitic		Anticancer
	%	m/n	p	m/n	p	m/n	p	m/n	p	m/n	p	m/n	p	m/n	p
TM1	100	24/72	1.000	19/72	1.000	11/72	1.000	58/72	1.48E-11	1/72	0.991	2/72	0.656	0/72	1.000
	90	14/29	1.000	13/29	0.999	10/29	1.000	23/29	2.23E-05	1/29	0.847	0/29	1.000	0/29	1.000
	80	10/24	1.000	9/24	1.000	6/24	1.000	20/24	1.98E-05	1/24	0.786	1/24	0.540	0/24	1.000
	70	9/20	1.000	8/20	0.998	5/20	1.000	15/20	0.0014707	1/20	0.721	2/20	0.116	0/20	1.000
	60	7/17	1.000	7/17	0.995	4/17	1.000	14/17	4.52E-04	1/17	0.676	2/17	0.096	0/17	1.000
	50	5/15	1.000	5/15	0.999	4/15	0.999	13/15	2.22E-04	0/15	1.000	2/15	0.076	0/15	1.000
TM2	100	18/19	0.243	16/19	0.131	18/19	0.00231172	7/19	0.753	1/19	0.711	4/19	0.002	0/19	1.000
	90	17/18	0.261	15/18	0.157	17/18	0.00297088	6/18	0.807	1/18	0.687	4/18	0.002	0/18	1.000
	80	16/17	0.261	14/17	0.176	16/17	0.00392434	6/17	0.752	1/17	0.664	3/17	0.015	0/17	1.000
	70	16/17	0.257	14/17	0.176	16/17	0.00392273	6/17	0.733	1/17	0.662	3/17	0.012	0/17	1.000
	60	14/15	0.297	14/15	0.026	14/15	0.00821318	6/15	0.603	1/15	0.630	4/15	0.001	0/15	1.000
	50	14/14	0.091	13/14	0.038	14/14	0.00143701	6/14	0.497	1/14	0.614	2/14	0.067	0/14	1.000
TM3	100	36/36	0.005	35/36	0.000	35/36	1.9223e-06	18/36	0.209	6/36	0.023	4/36	0.023	0/36	1.000
	90	22/22	0.036	21/22	0.004	21/22	0.000564658	10/22	0.398	3/22	0.154	3/22	0.028	0/22	1.000
	80	16/16	0.077	16/16	0.003	16/16	0.00056031	9/16	0.152	2/16	0.260	1/16	0.404	0/16	1.000
	70	17/17	0.064	17/17	0.002	17/17	0.000349712	8/17	0.355	1/17	0.662	0/17	1.000	0/17	1.000
	60	15/15	0.078	15/15	0.003	15/15	0.000807307	8/15	0.217	1/15	0.630	0/15	1.000	0/15	1.000
	50	15/15	0.077	15/15	0.003	15/15	0.00089791	7/15	0.373	1/15	0.640	0/15	1.000	0/15	1.000
TM4	100	18/18	0.070	16/18	0.059	16/18	0.019	12/18	0.030	8/18	5.48E-06	1/18	0.431	0/18	1.000
	90	11/11	0.191	10/11	0.109	10/11	0.048	7/11	0.106	5/11	0.000299675	0/11	1.000	0/11	1.000
	80	10/10	0.202	9/10	0.133	9/10	0.065	6/10	0.175	4/10	0.0022	0/10	1.000	0/10	1.000
	70	9/9	0.235	8/9	0.178	8/9	0.095	5/9	0.263	4/9	0.0013	0/9	1.000	0/9	1.000
	60	7/7	0.306	6/7	0.297	6/7	0.191	4/7	0.293	3/7	0.0074	0/7	1.000	0/7	1.000
	50	7/7	0.303	6/7	0.302	6/7	0.198	4/7	0.279	3/7	0.0079	0/7	1.000	0/7	1.000
TM5	100	14/24	1.000	6/24	1.000	6/24	1.000	4/24	0.998	13/24	2.27E-10	2/24	0.167	2/24	0.096
	90	4/9	1.000	2/9	1.000	2/9	0.998	2/9	0.935	7/9	1.03E-07	2/9	0.029	1/9	0.178
	80	3/7	0.999	1/7	1.000	1/7	0.999	1/7	0.974	4/7	0.000424249	1/7	0.202	1/7	0.142
	70	1/4	1.000	1/4	0.991	1/4	0.981	1/4	0.870	3/4	0.000868876	0/4	1.000	0/4	1.000
	60	0/1	1.000	0/1	1.000	0/1	1.000	0/1	1.000	1/1	0.064	0/1	1.000	0/1	1.000
	50	1/2	0.976	0/2	1.000	0/2	1.000	0/2	1.000	1/2	0.127	1/2	0.061	1/2	0.043
TM6	100	11/11	0.197	5/11	0.978	8/11	0.395	3/11	0.906	0/11	1.000	0/11	1.000	0/11	1.000
	90	5/5	0.472	4/5	0.522	4/5	0.396	3/5	0.328	0/5	1.000	0/5	1.000	0/5	1.000
	80	4/4	0.528	3/4	0.633	3/4	0.523	2/4	0.534	0/4	1.000	0/4	1.000	0/4	1.000
	70	4/4	0.526	3/4	0.634	3/4	0.524	2/4	0.523	0/4	1.000	0/4	1.000	0/4	1.000
	60	4/4	0.508	3/4	0.624	3/4	0.516	2/4	0.528	0/4	1.000	0/4	1.000	0/4	1.000
	50	4/4	0.506	3/4	0.629	3/4	0.524	2/4	0.515	0/4	1.000	0/4	1.000	0/4	1.000
TM7	100	9/9	0.264	8/9	0.195	5/9	0.810	2/9	0.945	0/9	1.000	0/9	1.000	0/9	1.000
	90	6/6	0.406	5/6	0.414	3/6	0.864	1/6	0.956	0/6	1.000	0/6	1.000	0/6	1.000
	80	5/5	0.450	4/5	0.507	3/5	0.729	1/5	0.926	0/5	1.000	0/5	1.000	0/5	1.000
	70	3/3	0.617	2/3	0.771	1/3	0.949	0/3	1.000	0/3	1.000	0/3	1.000	0/3	1.000
	60	1/1	0.845	1/1	0.685	1/1	0.624	0/1	1.000	0/1	1.000	0/1	1.000	0/1	1.000
	50	2/2	0.711	2/2	0.472	1/2	0.862	1/2	0.633	0/2	1.000	0/2	1.000	0/2	1.000
TM9	100	10/12	0.779	11/12	0.084	10/12	0.133	3/12	0.936	0/12	1.000	2/12	0.050	1/12	0.234
	90	8/8	0.300	7/8	0.249	7/8	0.145	2/8	0.900	0/8	1.000	1/8	0.221	0/8	1.000
	80	8/8	0.279	7/8	0.235	7/8	0.138	2/8	0.900	0/8	1.000	1/8	0.227	0/8	1.000
	70	8/8	0.276	7/8	0.235	7/8	0.138	2/8	0.893	0/8	1.000	1/8	0.213	0/8	1.000
	60	8/8	0.258	7/8	0.225	7/8	0.133	2/8	0.896	0/8	1.000	1/8	0.224	0/8	1.000
	50	7/7	0.303	7/7	0.072	6/7	0.198	2/7	0.835	0/7	1.000	1/7	0.198	0/7	1.000
TM10	100	6/6	0.412	5/6	0.419	4/6	0.625	4/6	0.208	0/6	1.000	0/6	1.000	0/6	1.000
	90	5/5	0.472	5/5	0.164	3/5	0.738	3/5	0.328	0/5	1.000	0/5	1.000	0/5	1.000
	80	5/5	0.450	4/5	0.507	3/5	0.729	3/5	0.327	0/5	1.000	0/5	1.000	0/5	1.000
	70	5/5	0.448	4/5	0.507	3/5	0.729	3/5	0.315	0/5	1.000	0/5	1.000	0/5	1.000
	60	4/4	0.508	3/4	0.624	2/4	0.847	3/4	0.181	0/4	1.000	0/4	1.000	0/4	1.000
	50	3/3	0.600	3/3	0.324	2/3	0.688	1/3	0.778	0/3	1.000	0/3	1.000	0/3	1.000
M/N	100	2641/3061		2141/3061		1956/3061		1286/3061		193/3061		94/3061		67/3061
	90	2043/2374		1655/2374		1503/2374		964/2374		148/2374		73/2374		51/2374
	80	1777/2081		1437/2084		1308/2084		845/2084		129/2084		66/2084		45/2084
	70	1647/1934		1334/1934		1214/1934		771/1934		119/1934		57/1934		41/1934
	60	2641/3061		1211/1769		1103/1769		711/1769		113/1769		55/1769		38/1769
	50	2641/3061		1132/1648		1035/1648		650/1648		108/1648		51/1648		36/1648
