# Supplementary material for: Structural and Functional Enrichment Analyses for Antimicrobial Peptides
Source: Preprints.org preprint supplement (doi:10.20944/preprints202007.0438.v1), 2020-07-19
Supplement: Supplementary file 6 [file TablesS6.xlsx]

## Sheet: TableS6.EnrichedStructure(TM) 
TM	Identity	Antibacterial		AntigramP		AntigramN		Antifungal		Antiviral		Antiparasitic		Anticancer
	%	m/n	p	m/n	p	m/n	p	m/n	p	m/n	p	m/n	p	m/n	p	M/N
TM1	100	24/146	1.000	19/121	1.000	11/113	1.000	58/111	7.01e-09	1/29	1.000	2/15	0.988	0/3	1.000	72/207
	90	14/92	1.000	13/82	1.000	10/77	1.000	23/57	0.000269431	1/17	0.996	0/10	1.000	0/1	1.000	29/113
	80	10/77	1.000	9/67	1.000	6/64	1.000	20/50	0.000337516	1/12	0.975	1/7	0.876	0/1	1.000	24/96
	70	9/72	1.000	8/64	1.000	5/61	1.000	15/42	0.006	1/10	0.938	2/6	0.419	0/0	1.000	20/87
	60	7/60	1.000	7/56	1.000	4/52	1.000	14/39	0.007	1/7	0.862	2/7	0.528	0/0	1.000	17/72
	50	5/58	1.000	5/54	1.000	4/51	1.000	13/36	0.002	0/6	1.000	2/6	0.389	0/1	1.000	15/69
TM2	100	18/146	0.009	16/121	0.013	18/113	9.45e-05	7/111	0.963	1/29	0.951	4/15	0.036	0/3	1.000	19/207
	90	17/92	0.105	15/82	0.207	17/77	0.0057192	6/57	0.968	1/17	0.959	4/10	0.052	0/1	1.000	18/113
	80	16/77	0.099	14/67	0.171	16/64	0.0054588	6/50	0.964	1/12	0.918	3/7	0.103	0/1	1.000	17/96
	70	16/72	0.152	14/64	0.278	16/61	0.012	6/42	0.929	1/10	0.901	3/6	0.086	0/0	1.000	17/87
	60	14/60	0.226	14/56	0.094	14/52	0.035	6/39	0.937	1/7	0.821	4/7	0.031	0/0	1.000	15/72
	50	14/58	0.066	13/54	0.129	14/51	0.008	6/36	0.860	1/6	0.758	2/6	0.352	0/1	1.000	14/69
TM3	100	36/146	7.92e-07	35/121	1.14e-08	35/113	7.3e-10	18/111	0.747	6/29	0.390	4/15	0.251	0/3	1.000	36/207
	90	22/92	0.006	21/82	0.0042165	21/77	0.0010493	10/57	0.776	3/17	0.691	3/10	0.303	0/1	1.000	22/113
	80	16/77	0.021	16/67	0.0016969	16/64	0.0011851	9/50	0.465	2/12	0.635	1/7	0.733	0/1	1.000	16/96
	70	17/72	0.027	17/64	0.0027883	17/61	0.0010851	8/42	0.648	1/10	0.901	0/6	1.000	0/0	1.000	17/87
	60	15/60	0.046	15/56	0.014	15/52	0.0038785	8/39	0.643	1/7	0.821	0/7	1.000	0/0	1.000	15/72
	50	15/58	0.053	15/54	0.015	15/51	0.005625	7/36	0.781	1/6	0.785	0/6	1.000	0/1	1.000	15/69
TM4	100	18/146	0.0013392	16/121	0.004	16/113	0.0015404	12/111	0.181	8/29	0.001	1/15	0.757	0/3	1.000	18/207
	90	11/92	0.092	10/82	0.138	10/77	0.079	7/57	0.274	5/17	0.011	0/10	1.000	0/1	1.000	11/113
	80	10/77	0.097	9/67	0.132	9/64	0.092	6/50	0.425	4/12	0.020	0/7	1.000	0/1	1.000	10/96
	70	9/72	0.166	8/64	0.252	8/61	0.183	5/42	0.456	4/10	0.009	0/6	1.000	0/0	1.000	9/87
	60	7/60	0.262	6/56	0.510	6/52	0.367	4/39	0.595	3/7	0.017	0/7	1.000	0/0	1.000	7/72
	50	7/58	0.279	6/54	0.523	6/51	0.408	4/36	0.550	3/6	0.012	0/6	1.000	0/1	1.000	7/69
TM5	100	14/146	0.945	6/121	1.000	6/113	1.000	4/111	1.000	13/29	4.93e-07	2/15	0.540	2/3	0.036	24/207
	90	4/92	0.999	2/82	1.000	2/77	1.000	2/57	0.985	7/17	1.52e-05	2/10	0.181	1/1	0.080	9/113
	80	3/77	0.997	1/67	1.000	1/64	1.000	1/50	0.996	4/12	0.0041953	1/7	0.422	1/1	0.073	7/96
	70	1/72	0.999	1/64	0.996	1/61	0.993	1/42	0.933	3/10	0.0042455	0/6	1.000	0/0	1.000	4/87
	60	0/60	1.000	0/56	1.000	0/52	1.000	0/39	1.000	1/7	0.097	0/7	1.000	0/0	1.000	1/72
	50	1/58	0.977	0/54	1.000	0/51	1.000	0/36	1.000	1/6	0.168	1/6	0.168	1/1	0.029	2/69
TM6	100	11/146	0.019	5/121	0.887	8/113	0.177	3/111	0.984	0/29	1.000	0/15	1.000	0/3	1.000	11/207
	90	5/92	0.350	4/82	0.581	4/77	0.488	3/57	0.508	0/17	1.000	0/10	1.000	0/1	1.000	5/113
	80	4/77	0.407	3/67	0.649	3/64	0.593	2/50	0.722	0/12	1.000	0/7	1.000	0/1	1.000	4/96
	70	4/72	0.462	3/64	0.716	3/61	0.655	2/42	0.665	0/10	1.000	0/6	1.000	0/0	1.000	4/87
	60	4/60	0.474	3/56	0.788	3/52	0.693	2/39	0.753	0/7	1.000	0/7	1.000	0/0	1.000	4/72
	50	4/58	0.491	3/54	0.796	3/51	0.723	2/36	0.725	0/6	1.000	0/6	1.000	0/1	1.000	4/69
TM7	100	9/146	0.040	8/121	0.055	5/113	0.614	2/111	0.990	0/29	1.000	0/15	1.000	0/3	1.000	9/207
	90	6/92	0.282	5/82	0.473	3/77	0.920	1/57	0.987	0/17	1.000	0/10	1.000	0/1	1.000	6/113
	80	5/77	0.323	4/67	0.522	3/64	0.795	1/50	0.978	0/12	1.000	0/7	1.000	0/1	1.000	5/96
	70	3/72	0.563	2/64	0.831	1/61	0.975	0/42	1.000	0/10	1.000	0/6	1.000	0/0	1.000	3/87
	60	1/60	0.833	1/56	0.778	1/52	0.722	0/39	1.000	0/7	1.000	0/7	1.000	0/0	1.000	1/72
	50	2/58	0.705	2/54	0.610	1/51	0.935	1/36	0.775	0/6	1.000	0/6	1.000	0/1	1.000	2/69
TM9	100	10/146	0.258	11/121	0.013	10/113	0.035	3/111	0.992	0/29	1.000	2/15	0.212	1/3	0.165	12/207
	90	8/92	0.182	7/82	0.299	7/77	0.210	2/57	0.971	0/17	1.000	1/10	0.535	0/1	1.000	8/113
	80	8/77	0.159	7/67	0.239	7/64	0.183	2/50	0.978	0/12	1.000	1/7	0.467	0/1	1.000	8/96
	70	8/72	0.205	7/64	0.320	7/61	0.245	2/42	0.964	0/10	1.000	1/6	0.445	0/0	1.000	8/87
	60	8/60	0.214	7/56	0.429	7/52	0.286	2/39	0.985	0/7	1.000	1/7	0.578	0/0	1.000	8/72
	50	7/58	0.279	7/54	0.164	6/51	0.408	2/36	0.959	0/6	1.000	1/6	0.487	0/1	1.000	7/69
TM10	100	6/146	0.119	5/121	0.206	4/113	0.432	4/111	0.412	0/29	1.000	0/15	1.000	0/3	1.000	6/207
	90	5/92	0.350	5/82	0.194	3/77	0.816	3/57	0.508	0/17	1.000	0/10	1.000	0/1	1.000	5/113
	80	5/77	0.323	4/67	0.522	3/64	0.795	3/50	0.539	0/12	1.000	0/7	1.000	0/1	1.000	5/96
	70	5/72	0.379	4/64	0.602	3/61	0.845	3/42	0.467	0/10	1.000	0/6	1.000	0/0	1.000	5/87
	60	4/60	0.474	3/56	0.788	2/52	0.938	3/39	0.373	0/7	1.000	0/7	1.000	0/0	1.000	4/72
	50	3/58	0.589	3/54	0.473	2/51	0.835	1/36	0.896	0/6	1.000	0/6	1.000	0/1	1.000	3/69
